# Supplementary material
Source: PubMed Central journal article supplement (PMC2901797)

# Supplemental Figure S1

MEF

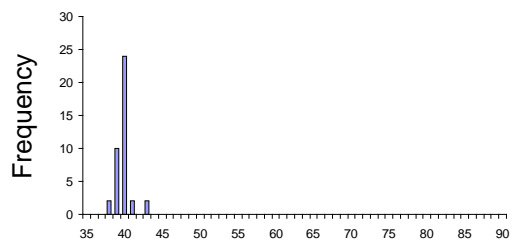

*Nanog* OE ESC  
X  
MEF hybrid

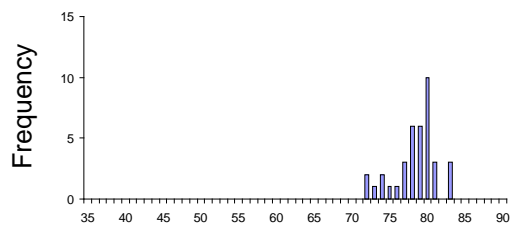

*Tcf3* RNAi ESC  
X  
MEF hybrid

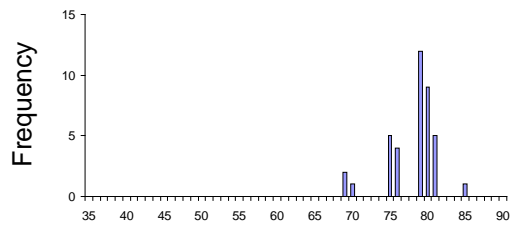

Chromosome number

# Supplemental Figure S2

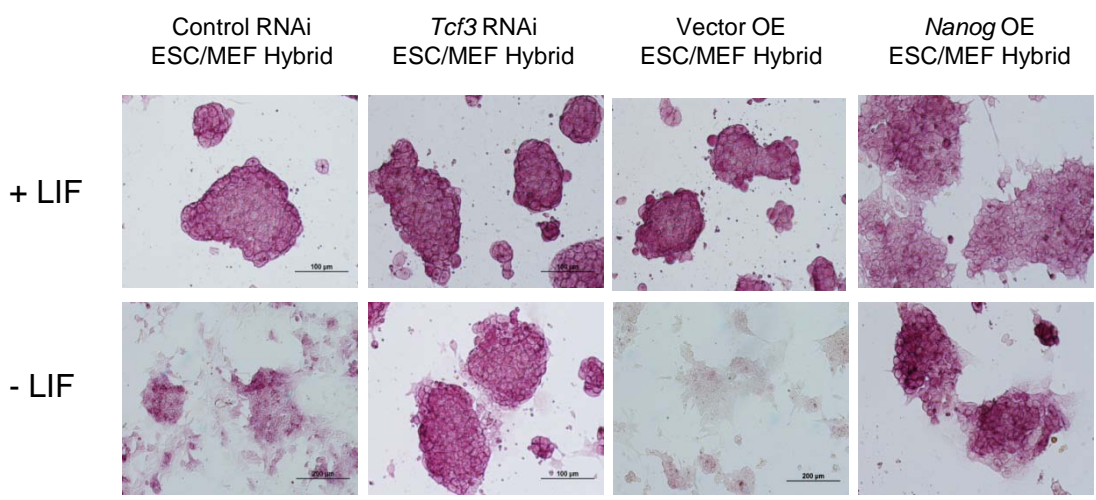

# Supplemental Figure S3

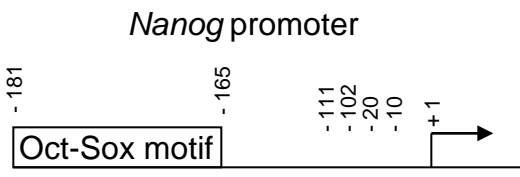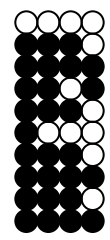

MEF

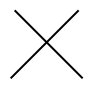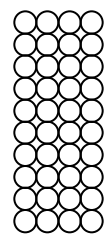

ESC  
(*Nanog* OE)

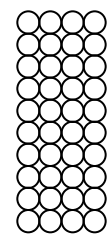

ESC/MEF  
Hybrid

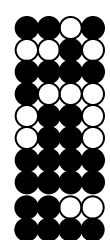

MEF

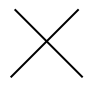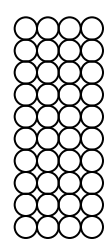

ESC  
(*Tcf3* RNAi)

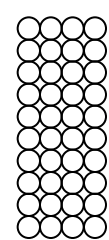

ESC/MEF  
Hybrid

# Supplemental Figure S4

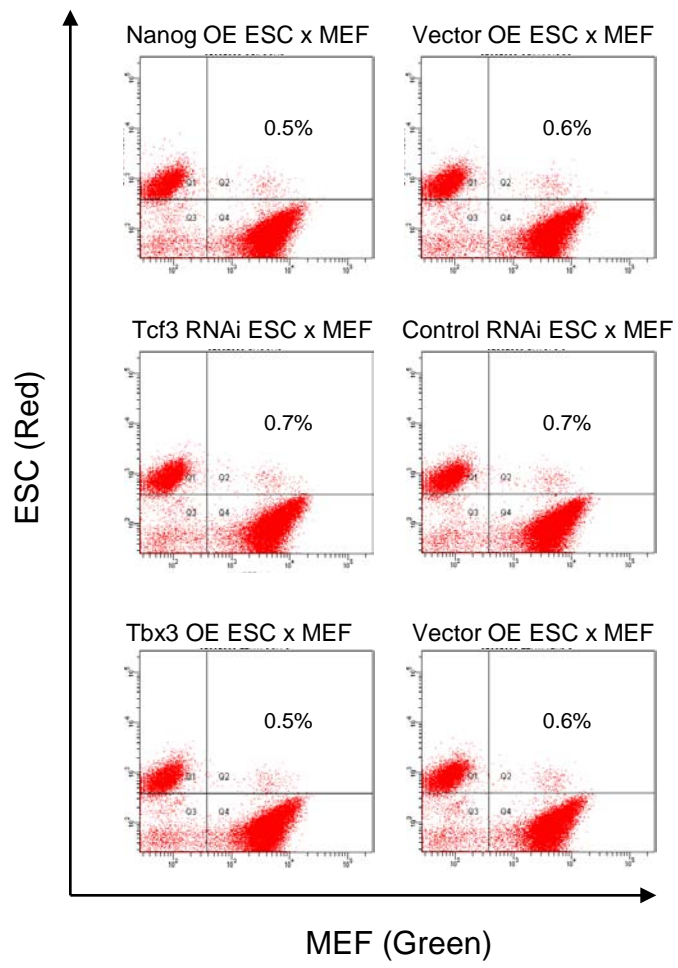

# Supplemental Figure S5

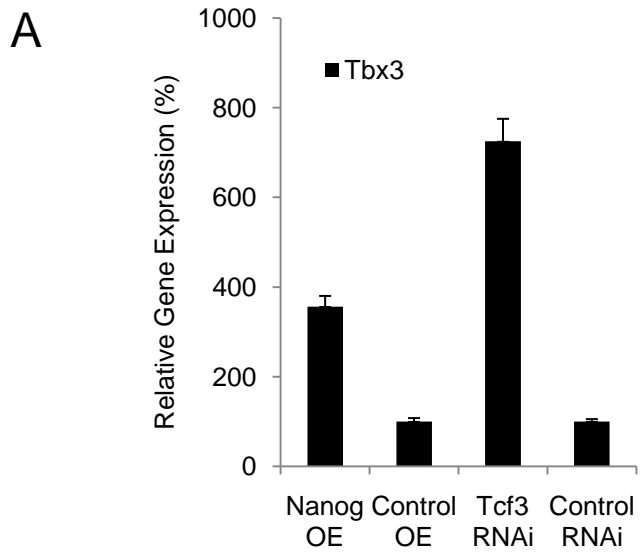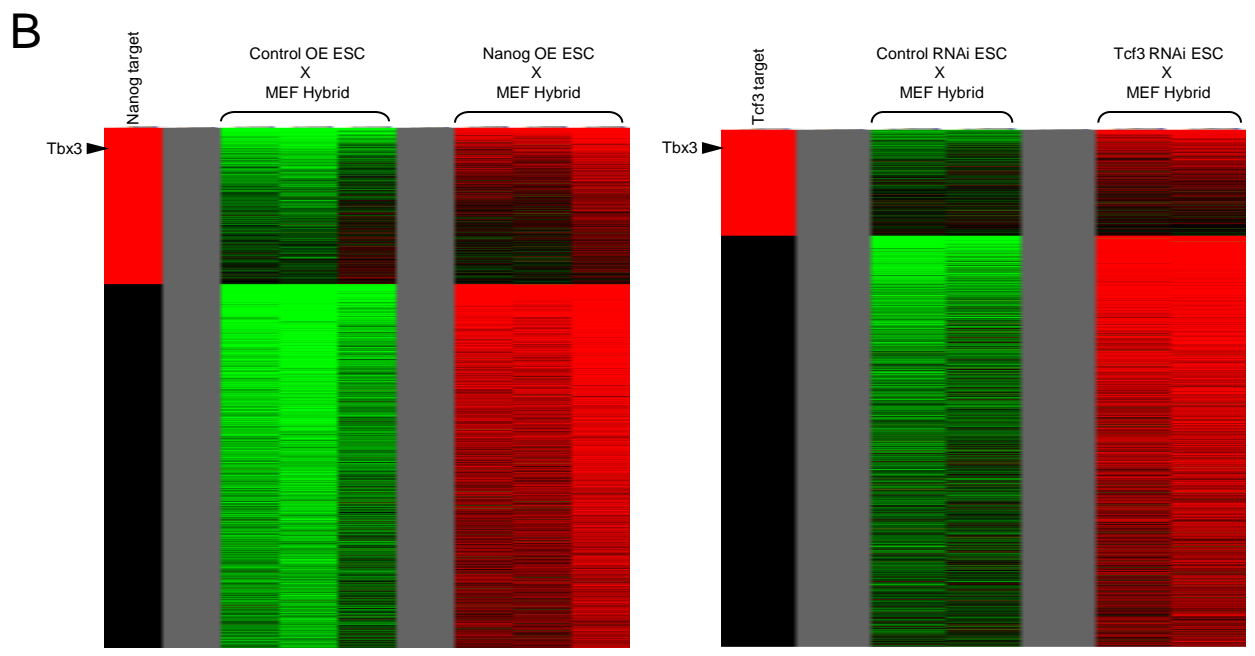

Supplemental Figure S6

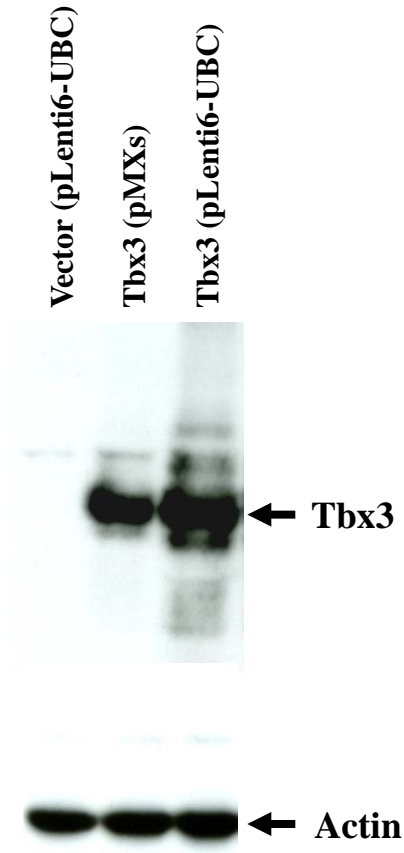

# Supplemental Figure S7

|                   | Isolated GFP+ colony number | Stable GFP+ line | Percentage |
|-------------------|-----------------------------|------------------|------------|
| OSK + c-Myc+ Tbx3 | 36                          | 12               | 33.3%      |
| OSK + cMyc        | 36                          | 18               | 50%        |
| OSK               | 36                          | 33               | 91.6%      |
| OSK + Tbx3        | 36                          | 32               | 88.8%      |

# Supplemental Figure S8

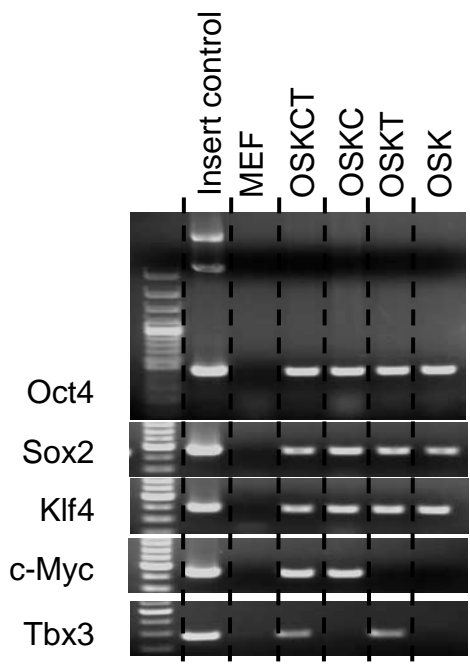



# Supplemental Figure S9

OSKT

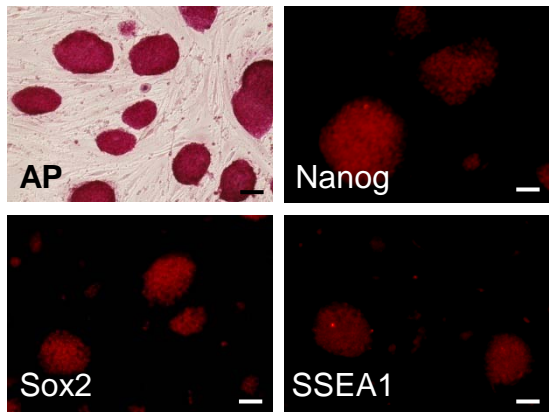

# Supplemental Figure S10

Teratoma (H&E stain)

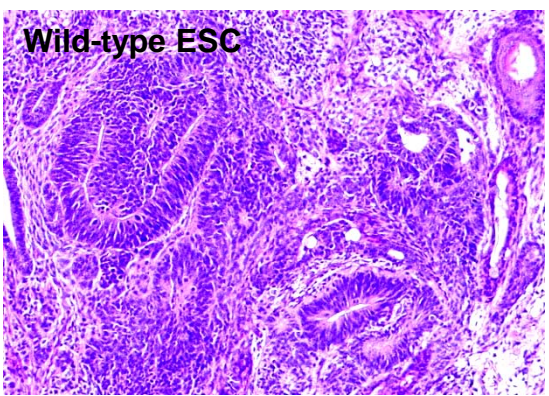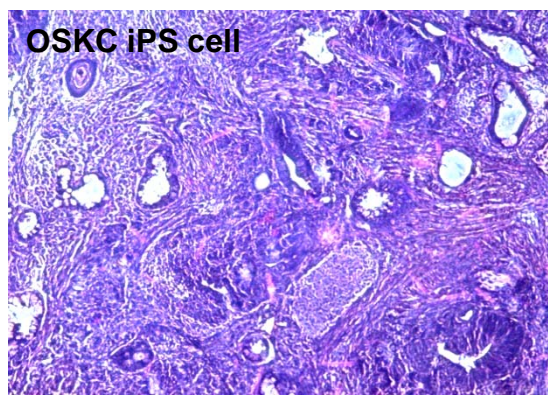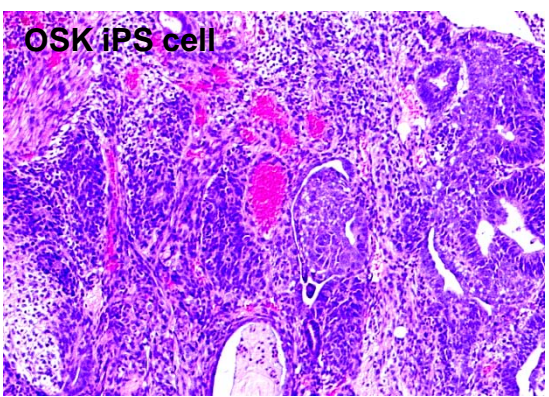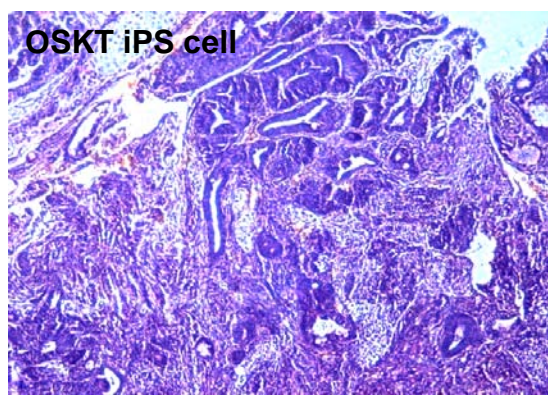

# Supplemental Figure S11

OSKT:OSK Distinguishing ESC Genes (qRT-PCR)

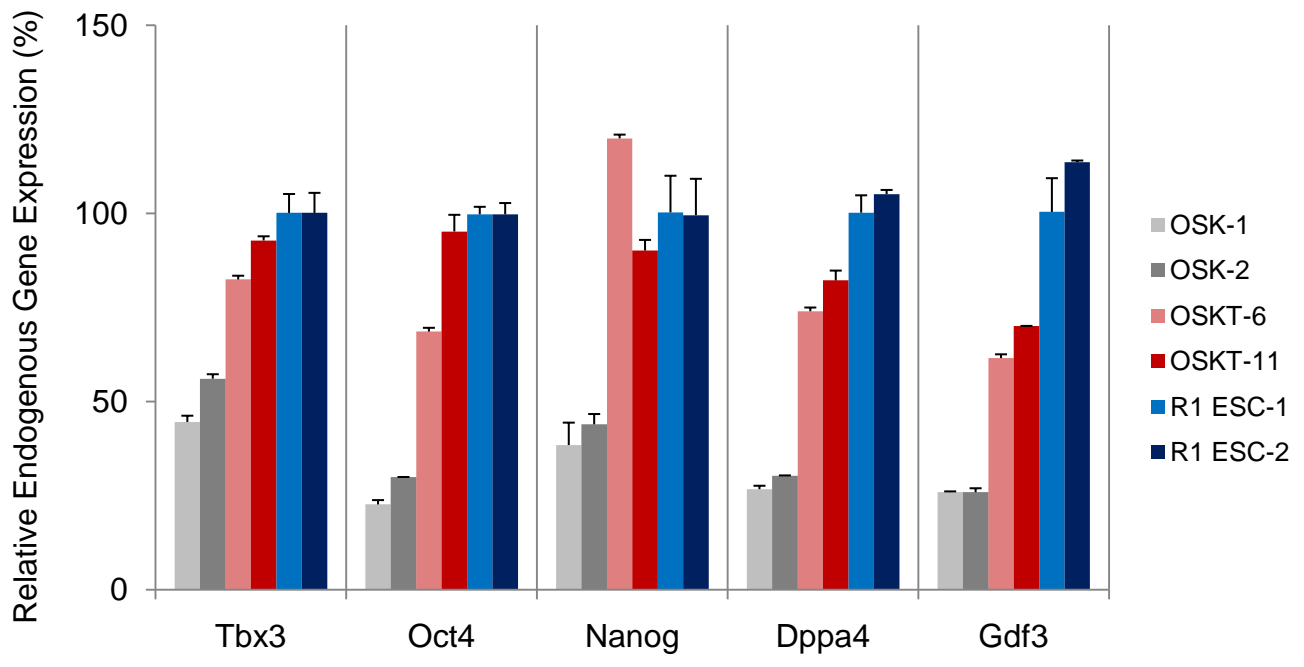

OSKT:OSK Non-distinguishing ESC Genes (qRT-PCR)

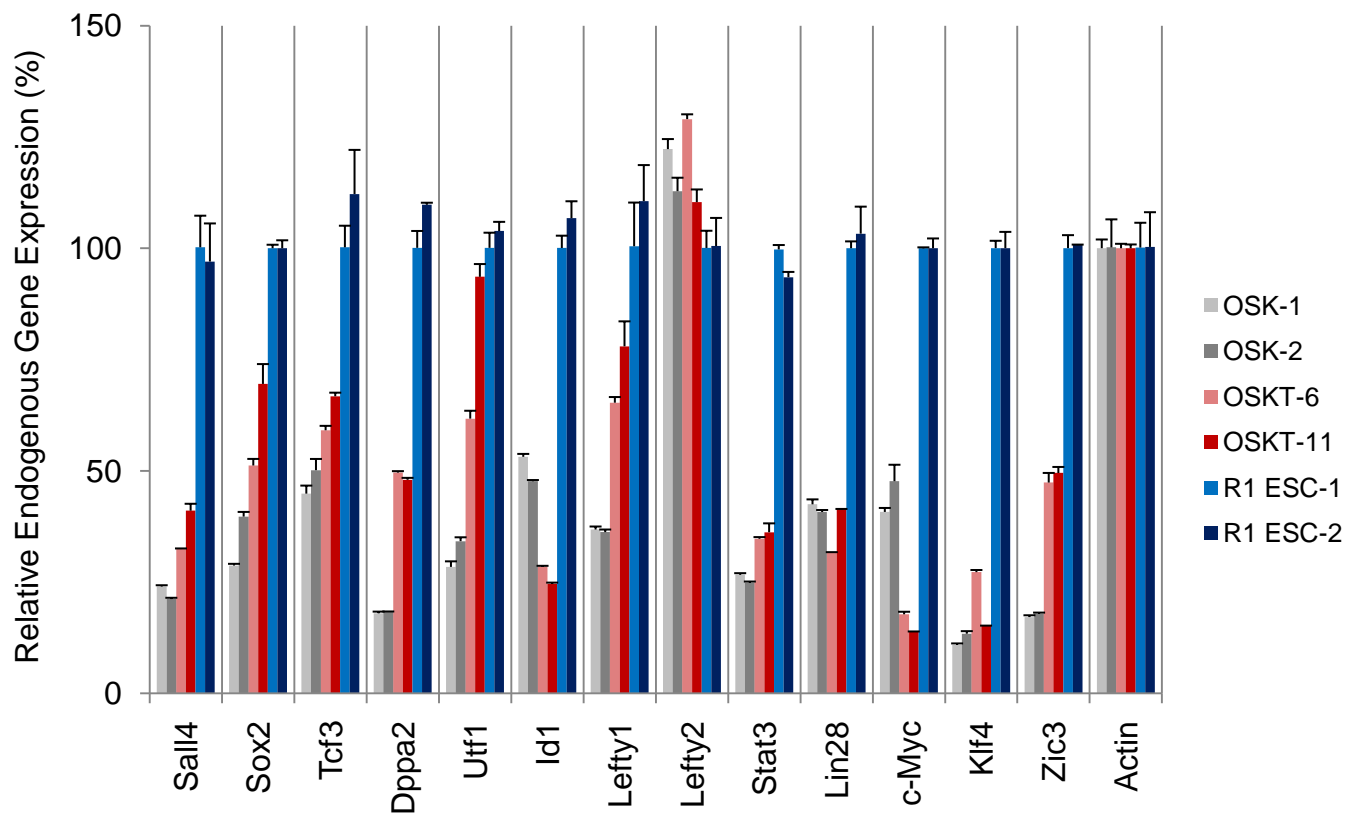

# Supplemental Figure S12

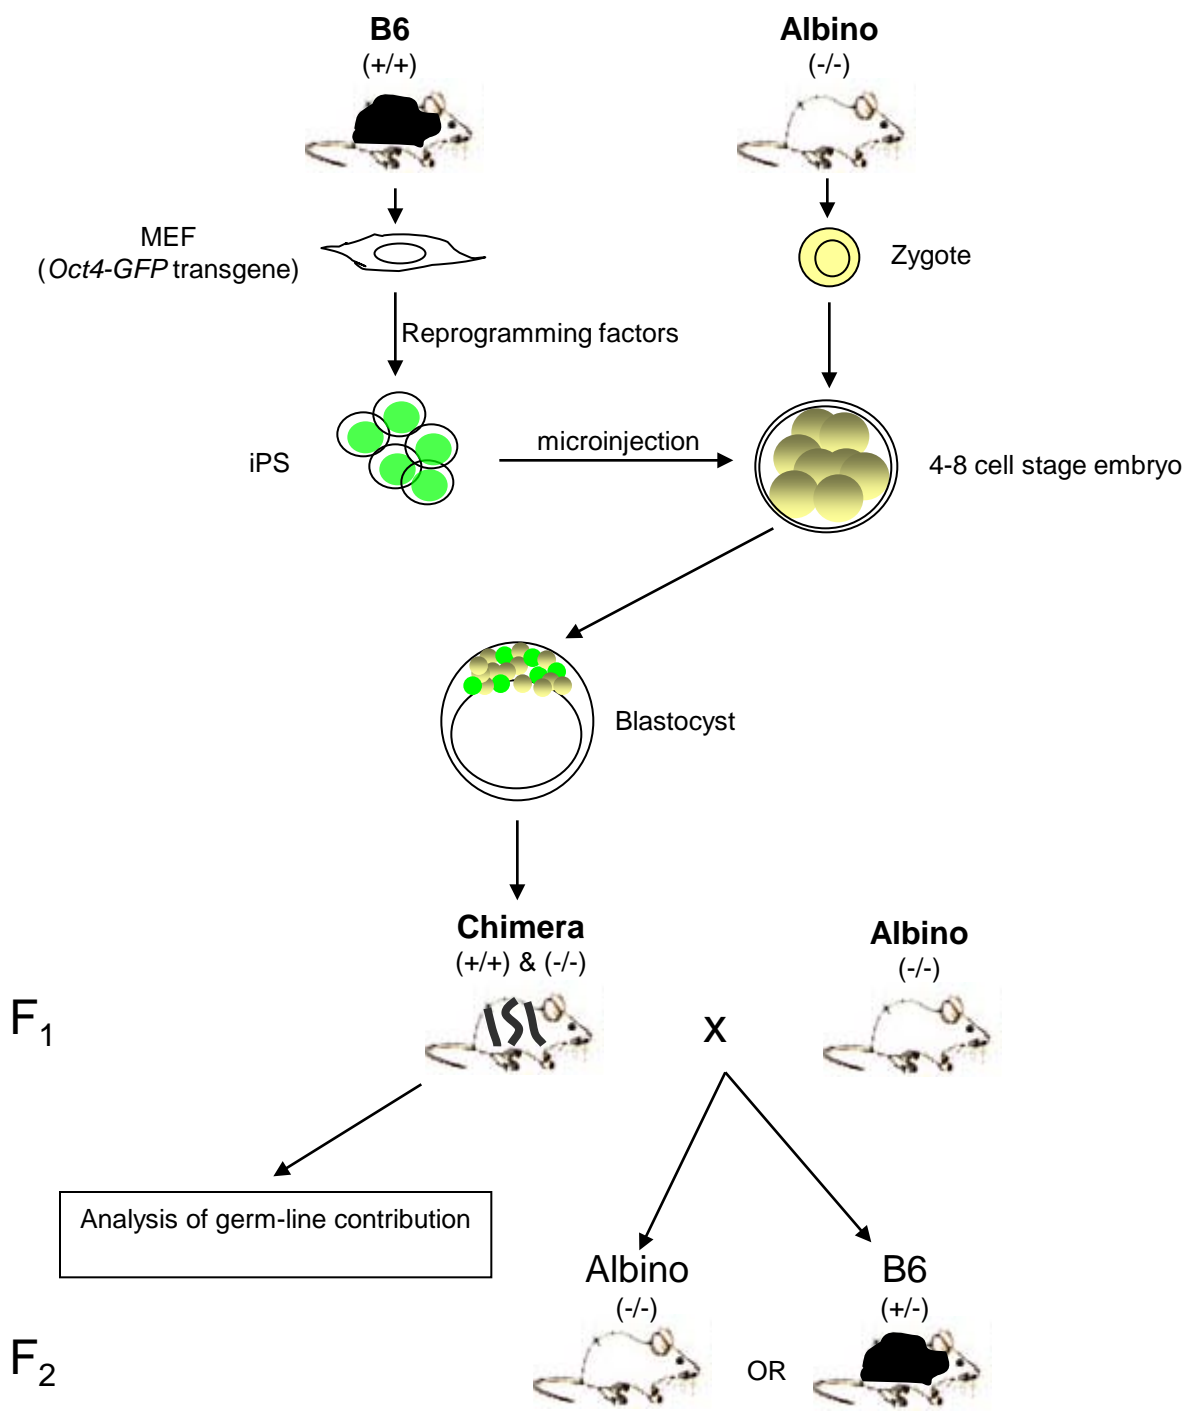

# Supplemental Figure S13

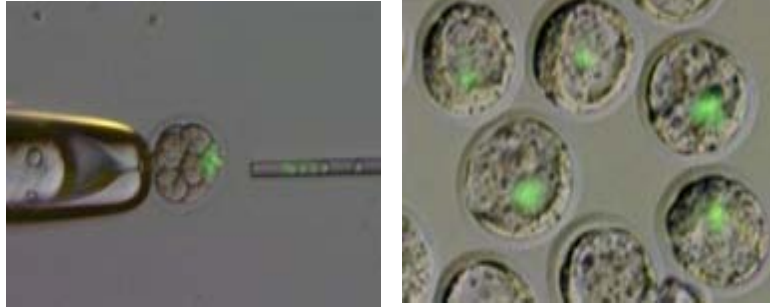

# Supplemental Figure S14A

|                  |               | >90%                                                                              | 50-90%                                                                            | <50%                                                                               |
|------------------|---------------|-----------------------------------------------------------------------------------|-----------------------------------------------------------------------------------|------------------------------------------------------------------------------------|
| <b>Reference</b> | <b>Testis</b> | 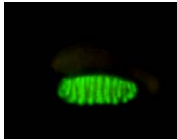 |  |  |
|                  | <b>Ovary</b>  |  |  |  |

## OSK

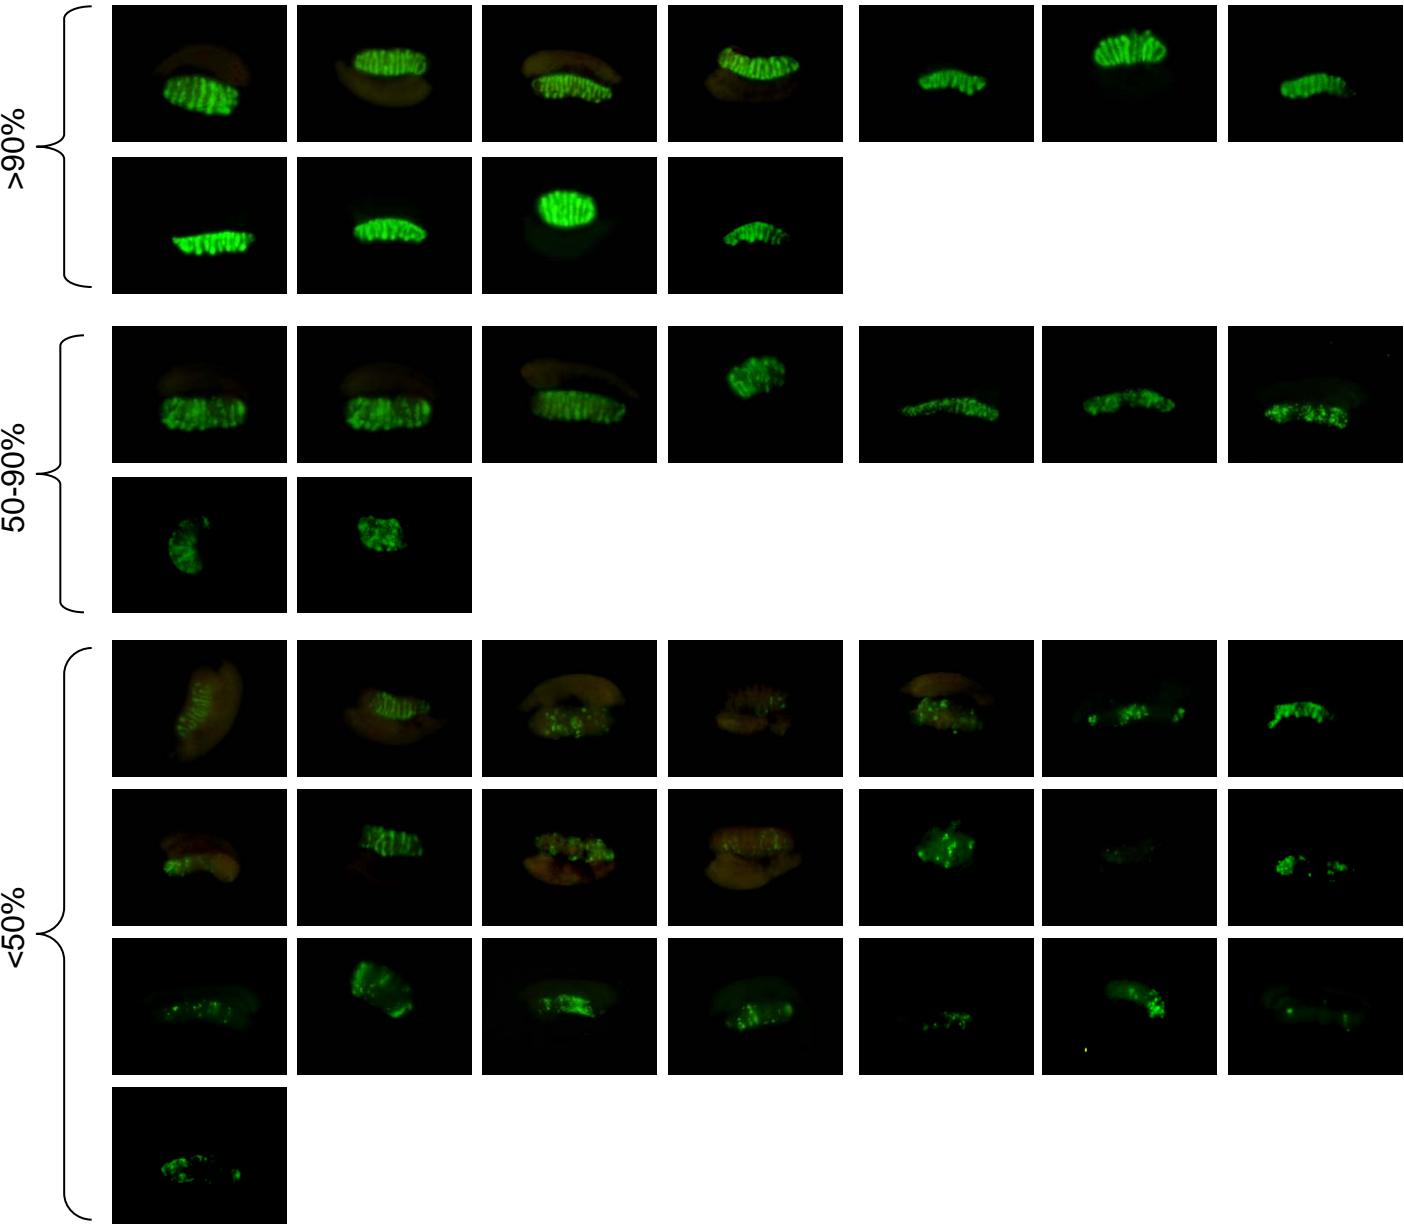

## OSE

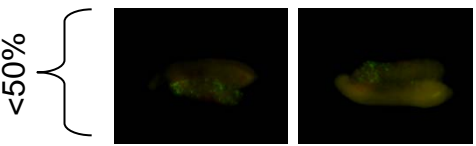

Supplemental Figure S14B

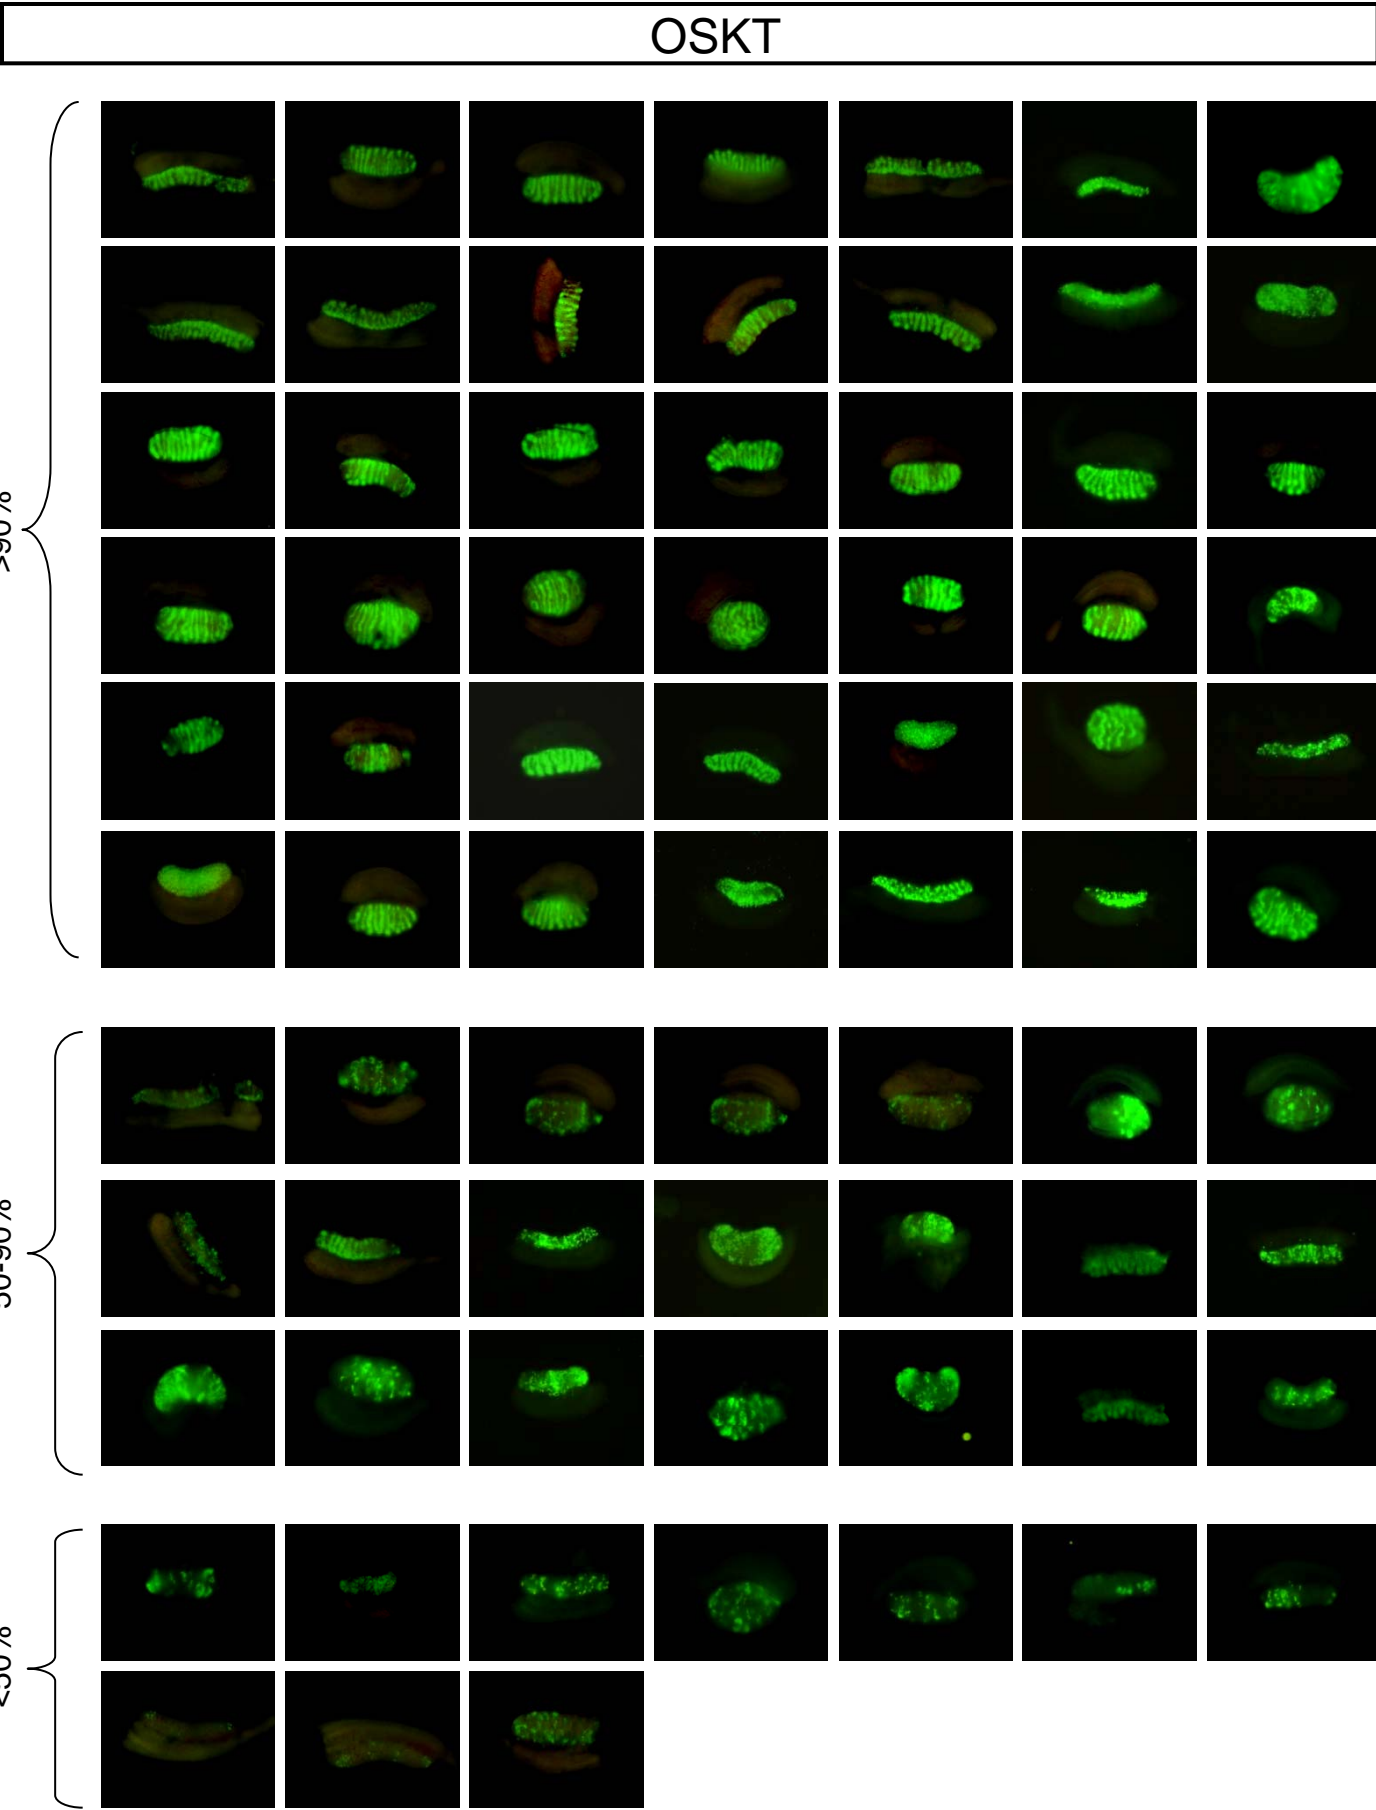

# Supplemental Figure S15

## Transgene silencing in iPS cell clones

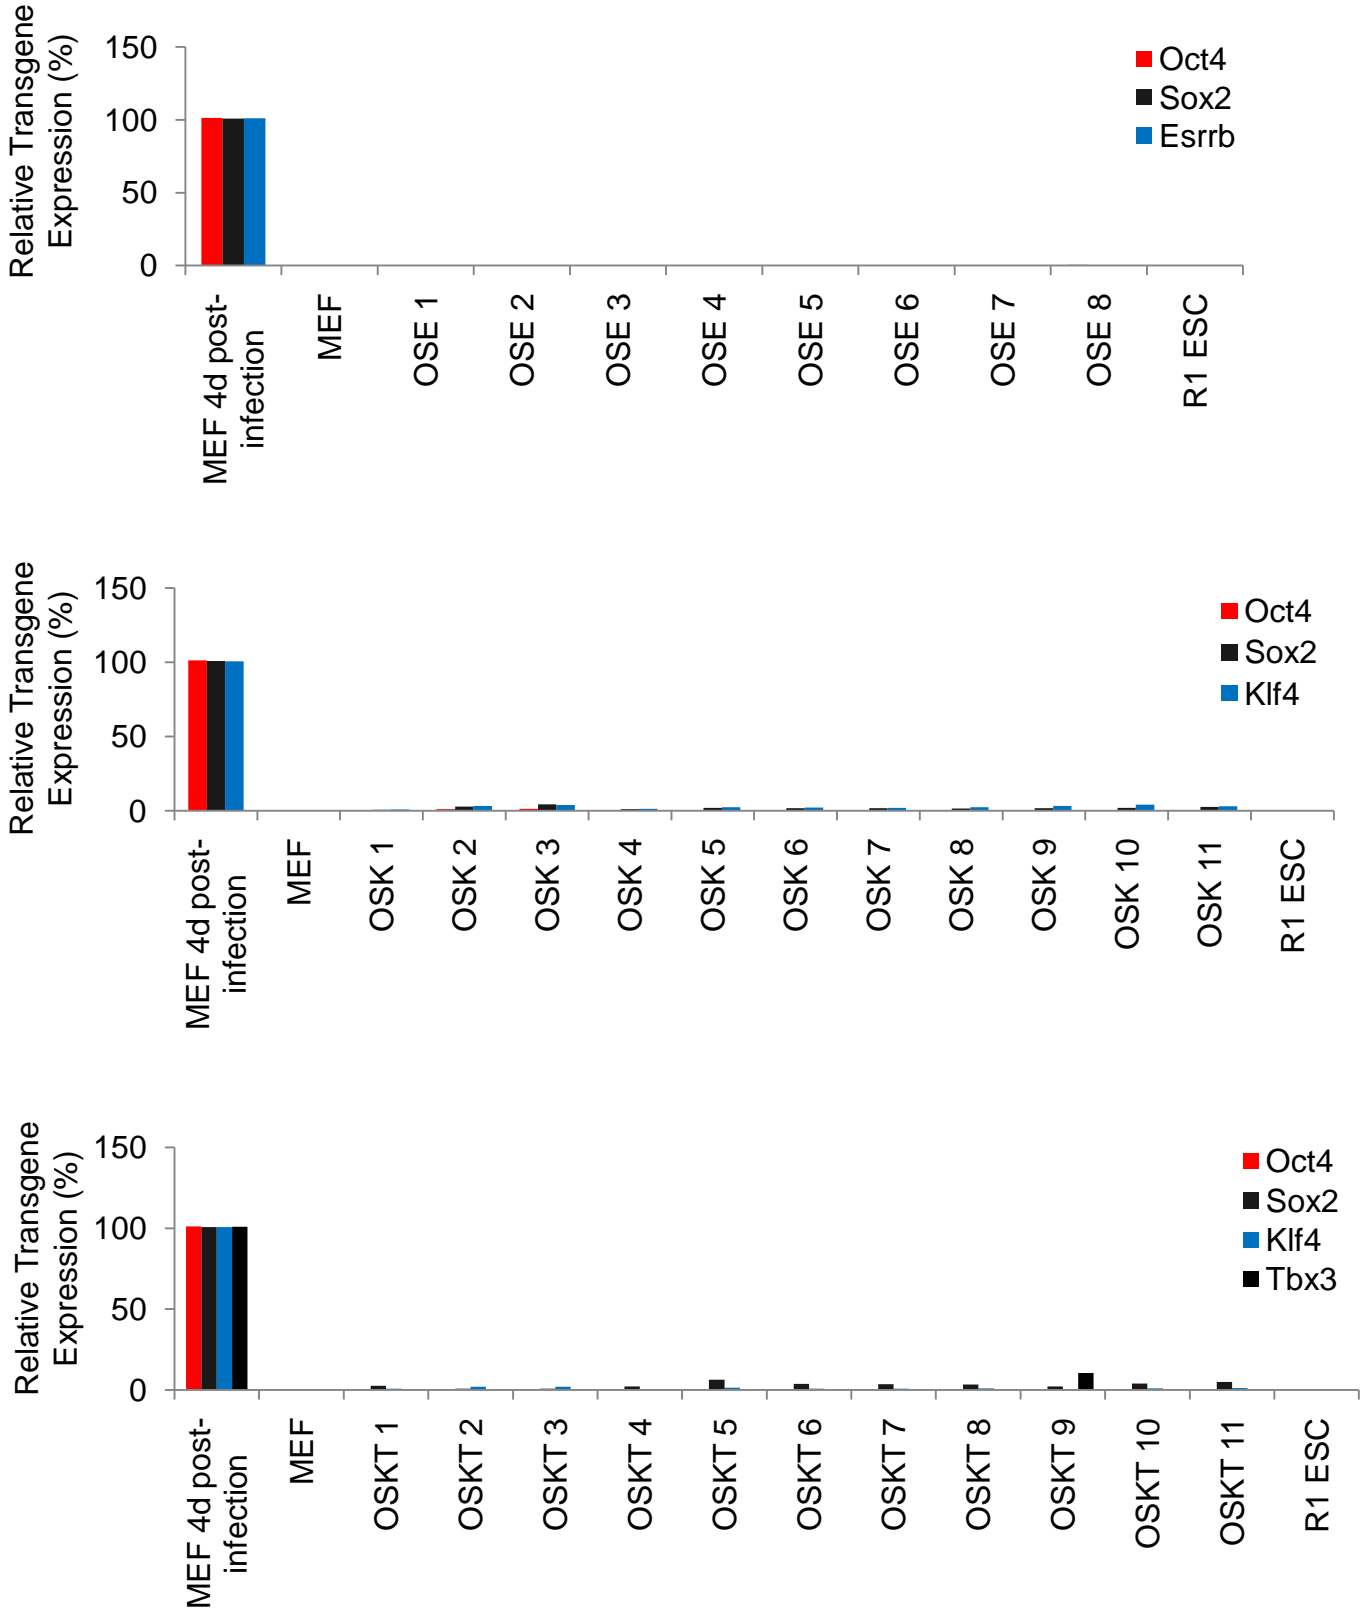



# Supplemental Figure S16

## Retroviral Integration Frequency in iPS cell clones

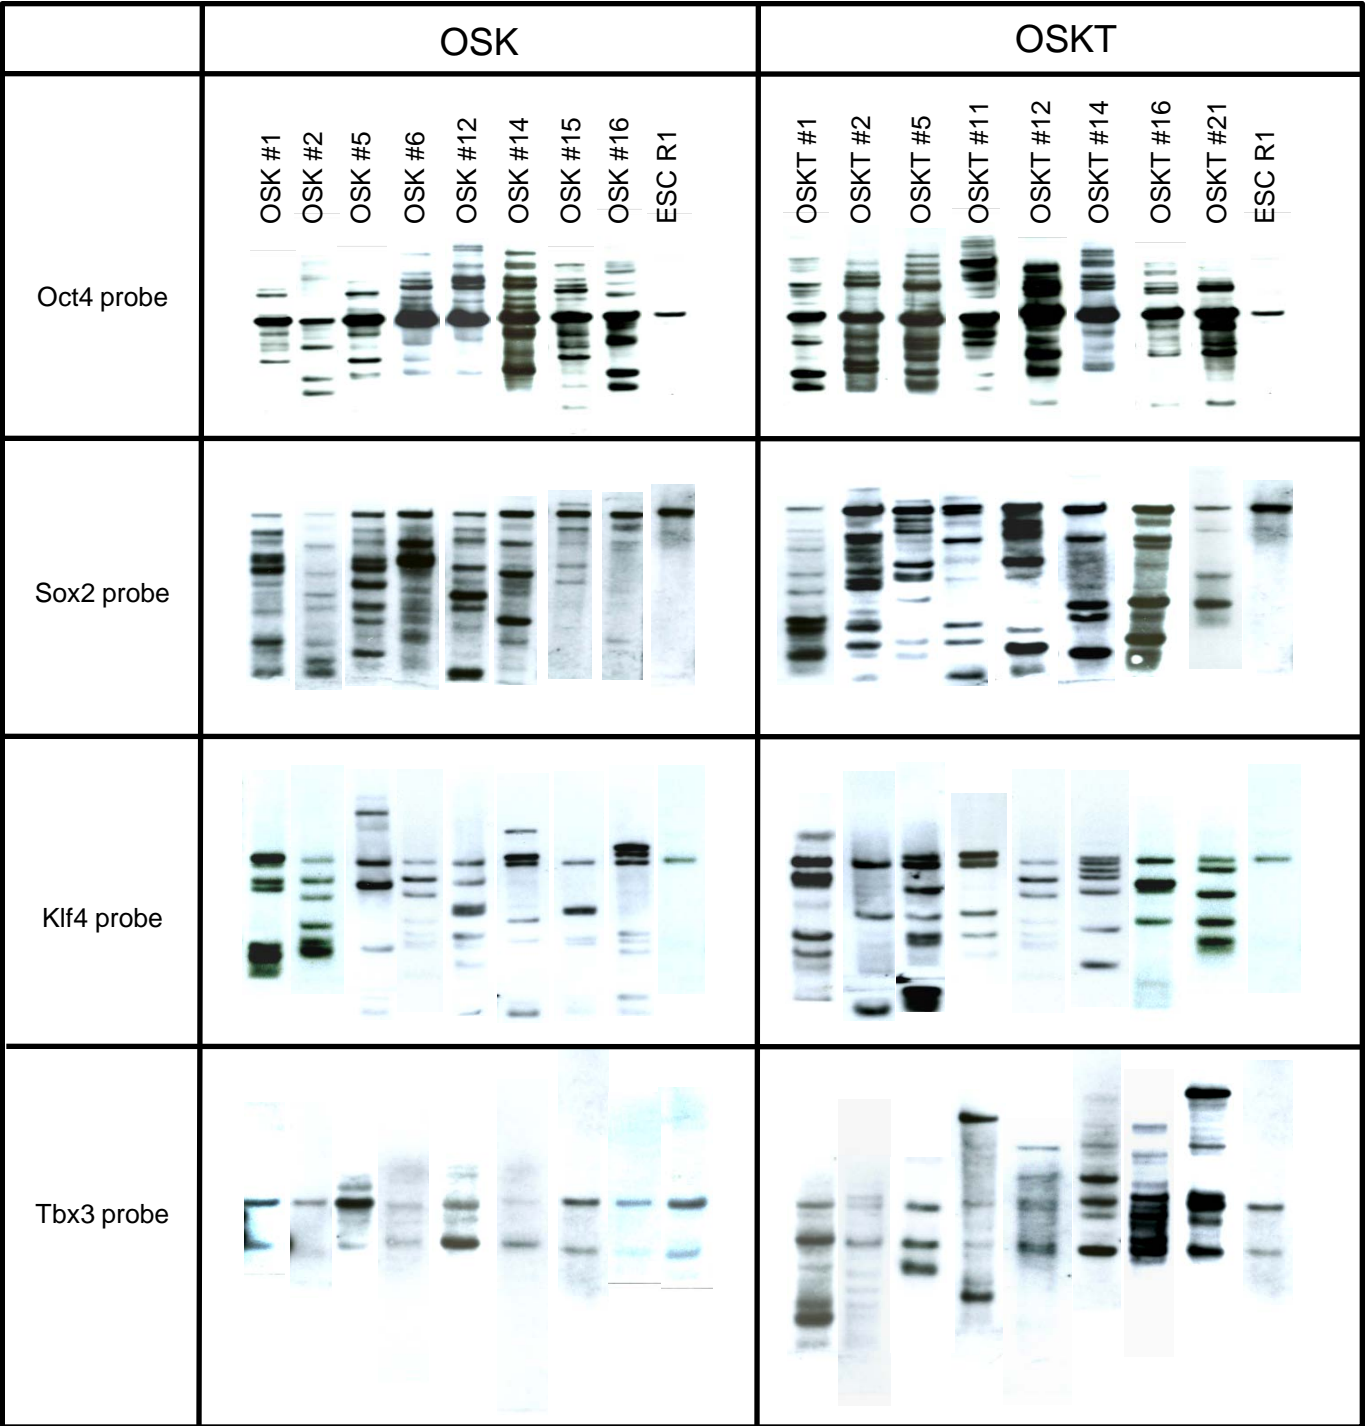



# Supplemental Figure S18

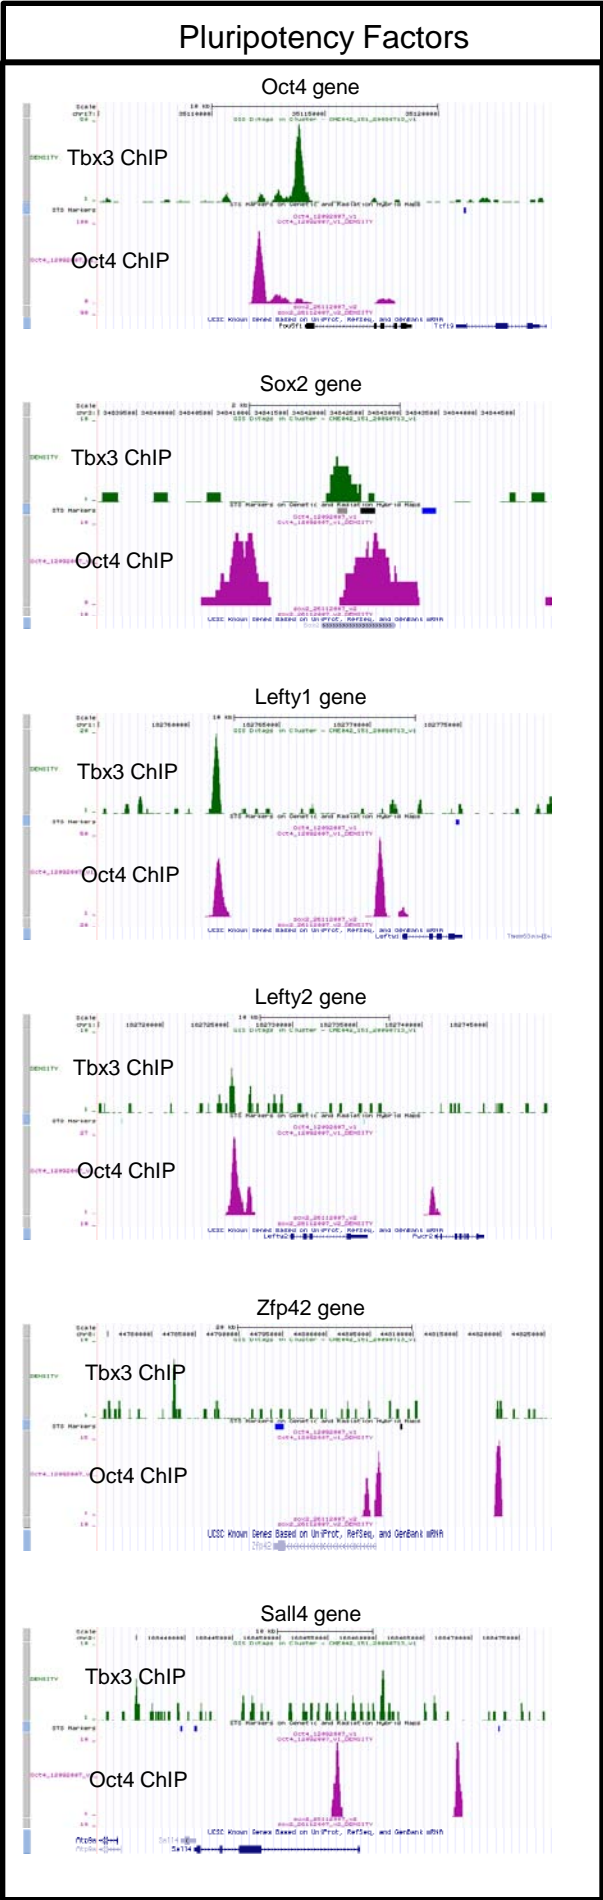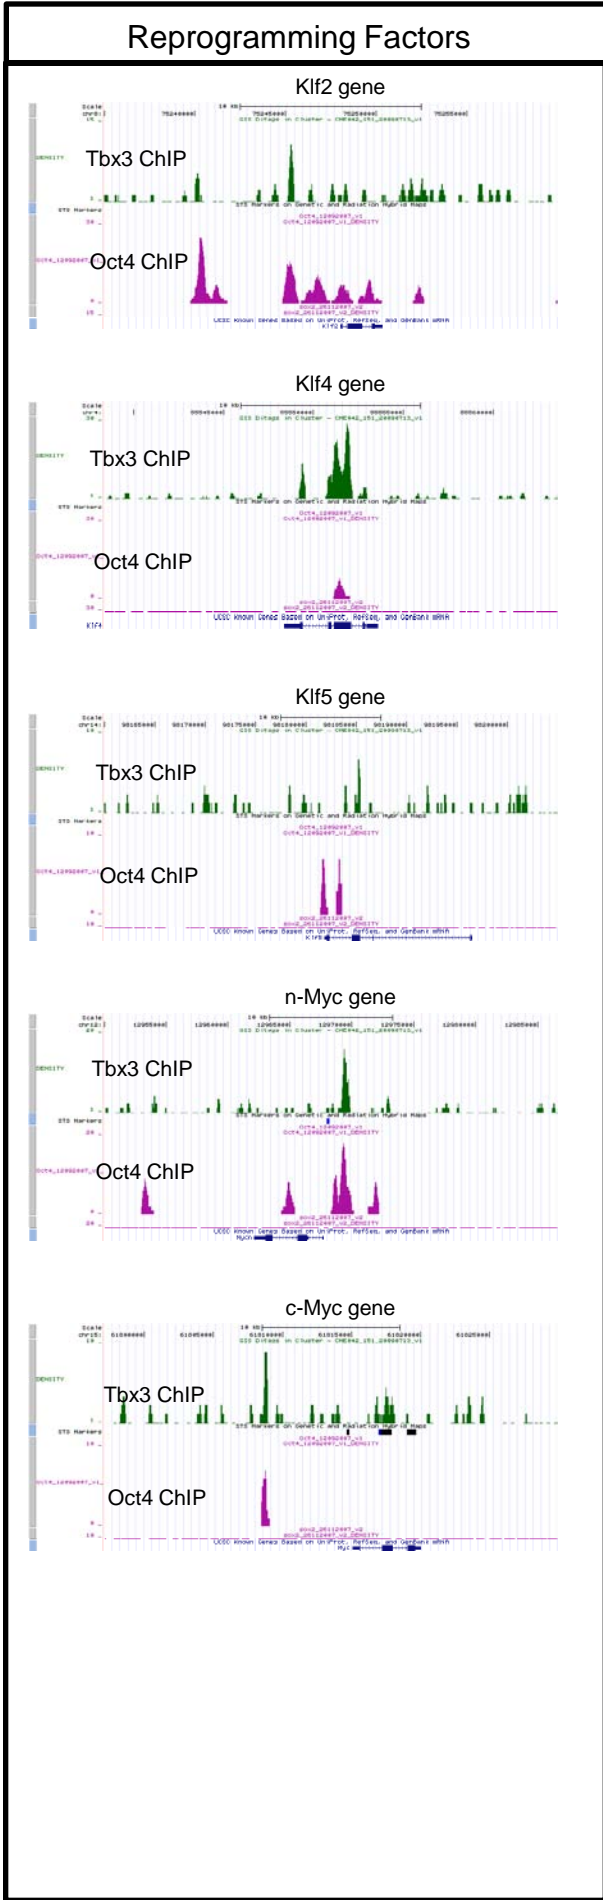

# Supplemental Figure S19

"Pluripotency Landmarks"

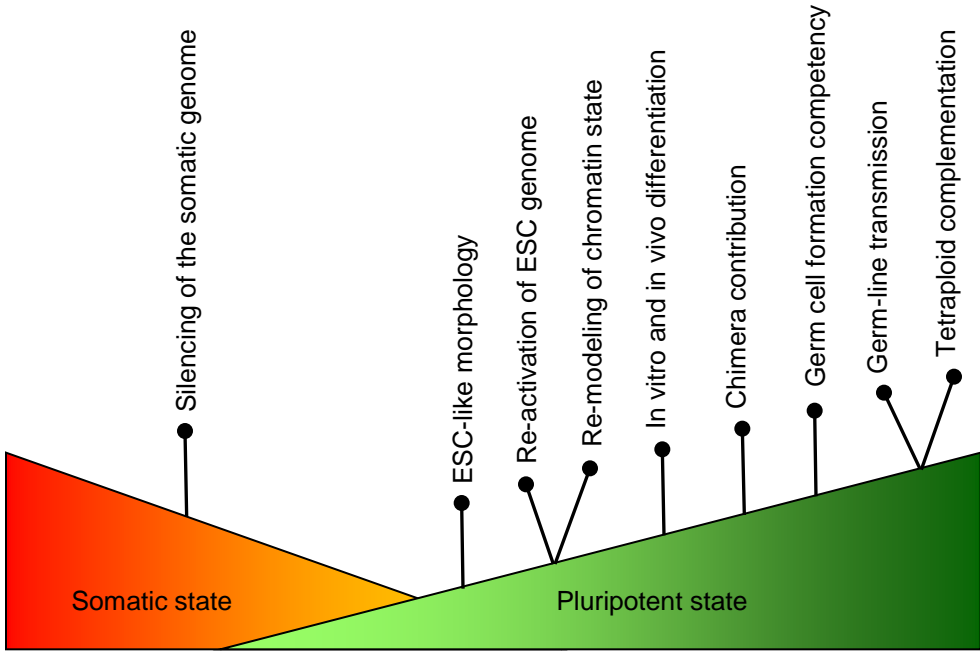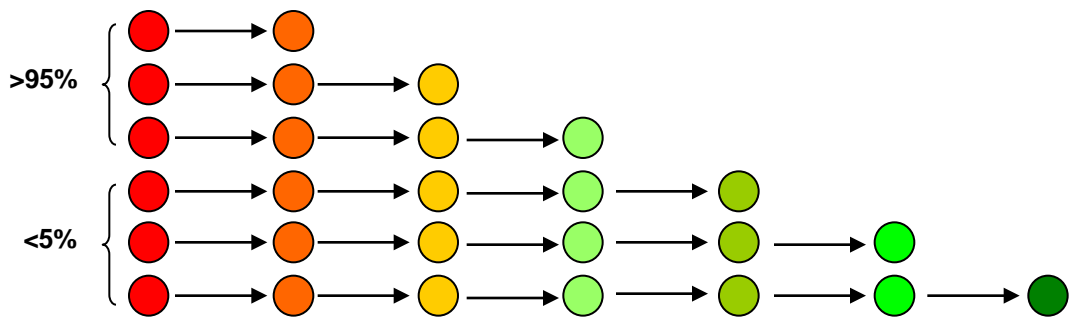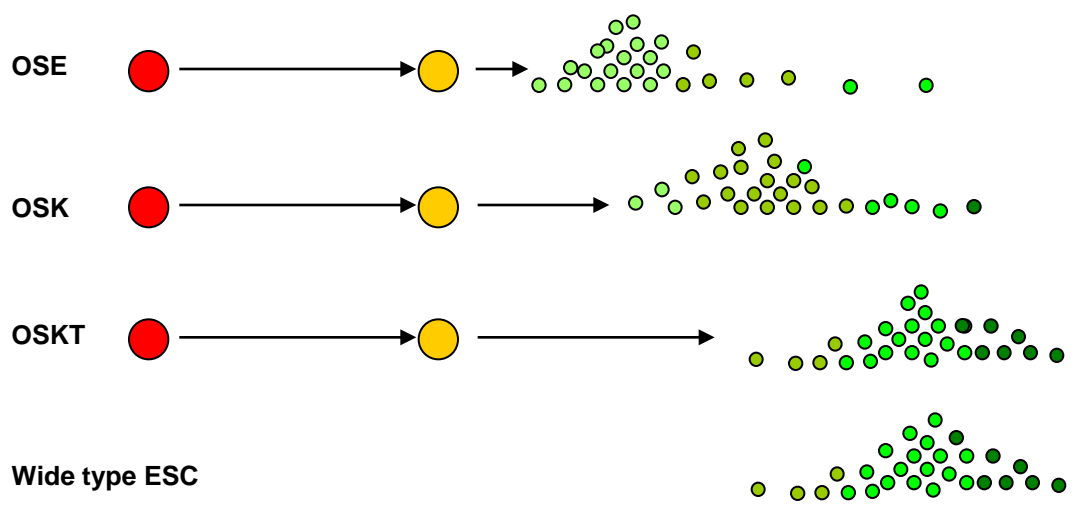

Supplement: NIHMS165695-supplement-2.pdf [file NIHMS165695-supplement-2.pdf]
